# Supplementary material for: Massive reduction in lattice thermal conductivity and strongly enhanced thermoelectric properties in Ge- and Se-doped CoSbS
Source: Royal Society of Chemistry journal article supplement (doi:10.1039/d4ta07047j), 2024-01-01
Supplement: d4ta07047j1.pdf [file d4ta07047j1.pdf]

## Title: Massive reduction in lattice thermal conductivity and strongly enhanced thermoelectric properties in Ge- and Se-doped CoSbS

H Sajida Kousar<sup>a</sup>, Divya Srivastava<sup>a</sup>, Antti J. Karttunen<sup>a</sup>, Maarit Karppinen<sup>\*a</sup>, Girish C Tewari<sup>\*a</sup>

### Supplementary Information:

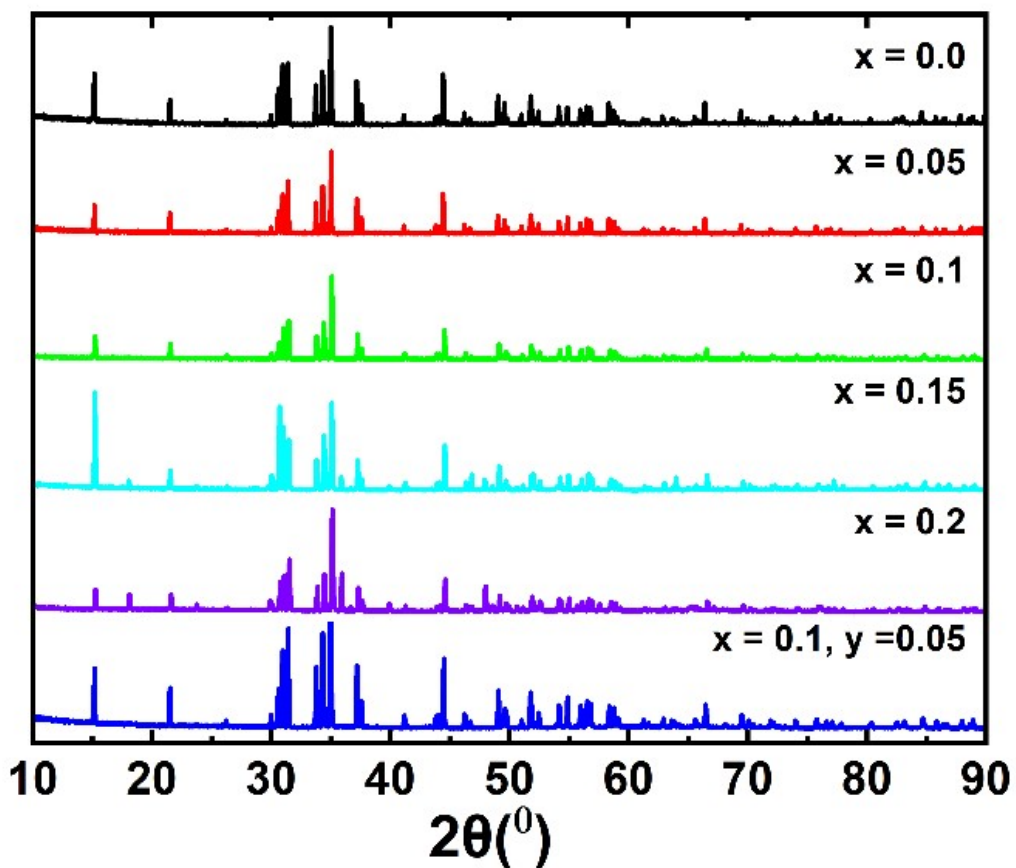

Figure S1. Powder X-ray diffraction pattern of all the polycrystalline  $\text{Co}(\text{Sb}_{1-x}\text{Ge}_x)(\text{S}_{1-y}\text{Se}_y)$  samples.

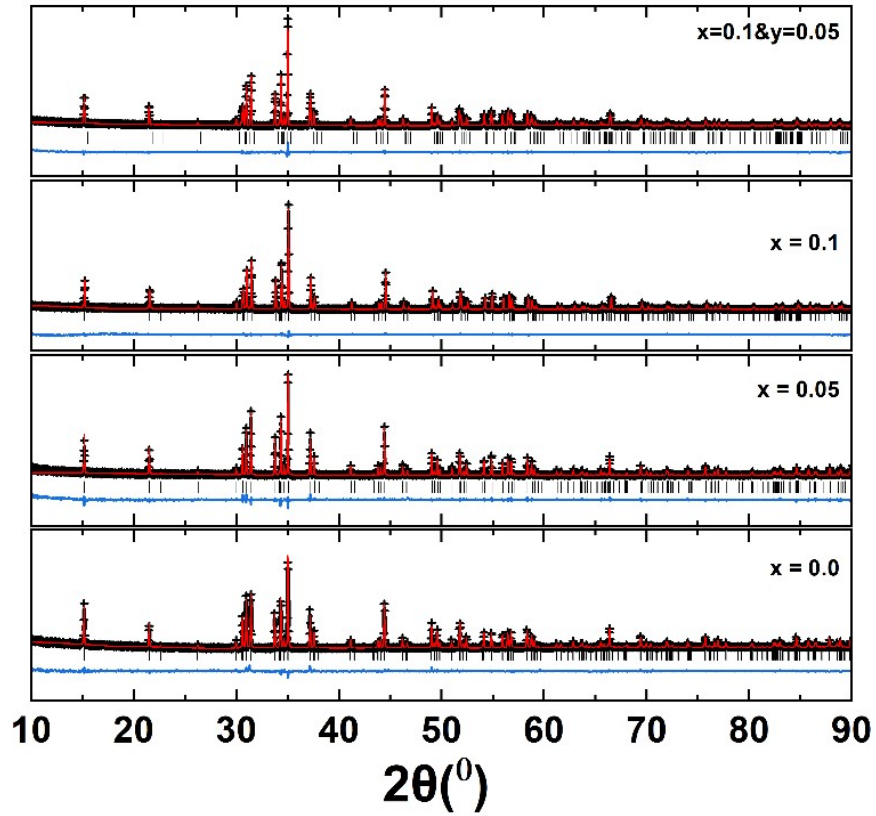

**Figure S2.** Rietveld refinement powder X-ray diffraction pattern of the polycrystalline  $\text{Co}(\text{Sb}_{1+x}\text{Ge}_x)(\text{S}_{1-y}\text{Se}_y)$  samples. Black + are the observed pattern, Red lines represents the calculated pattern, vertical black bars are the Bragg positions, and the blue lines indicate the difference between observed and calculated patterns.

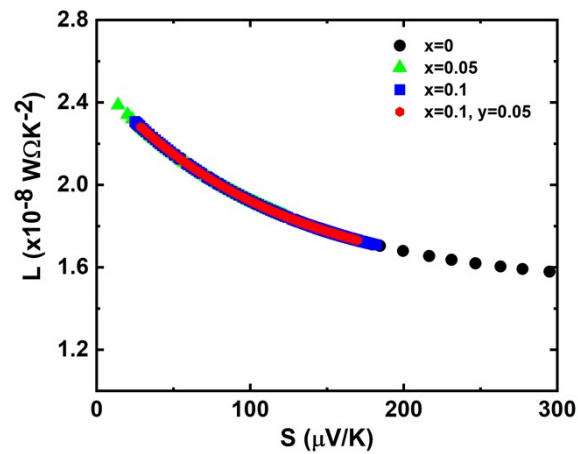

**Figure S3.** Lorentz number versus Seebeck coefficient for polycrystalline  $\text{Co}(\text{Sb}_{1+x}\text{Ge}_x)(\text{S}_{1-y}\text{Se}_y)$  samples.

**Table S1.** Atomic positions and occupancies obtained from Rietveld refinement of XRD pattern for the  $\text{Co}(\text{Sb}_{1+x}\text{Ge}_x)(\text{S}_{1-y}\text{Se}_y)$  samples.

| Sample                  | Element   | X         | Y        | Z        | Biso  | Occup.    |
|-------------------------|-----------|-----------|----------|----------|-------|-----------|
| <b>x = 0.0</b>          | <b>Co</b> | 0.012(4)  | 0.164(5) | 0.384(4) | 0.447 | 1.0000    |
|                         | <b>Sb</b> | 0.116(3)  | 0.050(3) | 0.179(1) | 0.962 | 0.997(3)  |
|                         | <b>S</b>  | -0.135(1) | 0.306(1) | 0.065(6) | 1.068 | 0.996(2)  |
| <b>x = 0.05</b>         | <b>Co</b> | 0.012(3)  | 0.166(3) | 0.385(4) | 1.03  | 1.0000    |
|                         | <b>Sb</b> | 0.117(4)  | 0.050(4) | 0.179(4) | 1.072 | 0.9492(3) |
|                         | <b>Ge</b> | 0.117(4)  | 0.050(4) | 0.179(4) | 1.072 | 0.0503(3) |
|                         | <b>S</b>  | -0.134(3) | 0.306(3) | 0.066(4) | 1.048 | 1.0000    |
| <b>x = 0.10</b>         | <b>Co</b> | 0.012(6)  | 0.165(6) | 0.383(3) | 1.085 | 1.0000    |
|                         | <b>Sb</b> | 0.118(3)  | 0.048(2) | 0.180(3) | 0.996 | 0.8952(3) |
|                         | <b>Ge</b> | 0.118(3)  | 0.048(2) | 0.180(3) | 0.996 | 0.0997(3) |
|                         | <b>S</b>  | -0.134(1) | 0.306(8) | 0.071(4) | 1.114 | 1.0000    |
| <b>x = 0.15</b>         | <b>Co</b> | 0.014(3)  | 0.153(3) | 0.376(4) | 1.455 | 1.0000    |
|                         | <b>Sb</b> | 0.115(4)  | 0.049(4) | 0.178(4) | 0.429 | 0.860(3)  |
|                         | <b>Ge</b> | 0.115(4)  | 0.049(4) | 0.178(4) | 0.429 | 0.138(3)  |
|                         | <b>S</b>  | -0.137(3) | 0.304(3) | 0.087(4) | 2.487 | 1.0000    |
| <b>x=0.1&amp;y=0.05</b> | <b>Co</b> | 0.013(3)  | 0.163(3) | 0.385(4) | 1.644 | 1.0000    |
|                         | <b>Sb</b> | 0.118(4)  | 0.047(4) | 0.179(4) | 1.323 | 0.9072(3) |
|                         | <b>Ge</b> | 0.118(4)  | 0.047(4) | 0.179(4) | 1.323 | 0.1000(4) |
|                         | <b>S</b>  | -0.134(3) | 0.307(3) | 0.066(3) | 1.295 | 0.9778(3) |
|                         | <b>Se</b> | -0.134(3) | 0.307(3) | 0.066(3) | 1.295 | 0.0375(3) |

**Table S2.** Crystal lattice parameters obtained from Rietveld refinement of XRD pattern for the  $\text{Co}(\text{Sb}_{1+x}\text{Ge}_x)(\text{S}_{1-y}\text{Se}_y)$  samples.

| Sample                  | a(Å)      | b(Å)      | c(Å)       |
|-------------------------|-----------|-----------|------------|
| <b>x = 0.0</b>          | 5.8431(6) | 5.9567(6) | 11.6700(4) |
| <b>x = 0.05</b>         | 5.8386(5) | 5.9513(5) | 11.6593(4) |
| <b>x = 0.10</b>         | 5.8365(5) | 5.9455(5) | 11.6405(4) |
| <b>x = 0.15</b>         | 5.8384(4) | 5.9439(4) | 11.6330(4) |
| <b>x = 0.2</b>          | 5.8434(4) | 5.9524(4) | 11.6503(4) |
| <b>x=0.1&amp;y=0.05</b> | 5.8481(4) | 5.9547(5) | 11.6579(4) |
